# Supplementary material for: Interference of sea salt in capture vaporizer-ToF-ACSM measurements of biomass burning organic aerosols in coastal locations
Source: Royal Society of Chemistry journal article supplement (doi:10.1039/d3ea00171g), 2024-01-01
Supplement: d3ea00171g1.pdf [file d3ea00171g1.pdf]

## Supplementary material

### S1. Past studies

Table S1. Past Capture Vaporizer-AMS or -ACSM studies that detected BBOA

| Author (Year)             | Study Location                  | DOI                                                                                                               |
|---------------------------|---------------------------------|-------------------------------------------------------------------------------------------------------------------|
| Hu et al. (2018)          | Centerville, AL, USA            | <a href="https://doi.org/10.1080/02786826.2018.1454584">https://doi.org/10.1080/02786826.2018.1454584</a>         |
| Xu et al. (2020)          | Laboratory standards            | <a href="https://doi.org/10.5194/amt-13-3205-2020">https://doi.org/10.5194/amt-13-3205-2020</a>                   |
| Joo et al. (2021)         | Atlanta, GA, USA                | <a href="https://doi.org/10.1021/acsearthspacechem.1c00173">https://doi.org/10.1021/acsearthspacechem.1c00173</a> |
| Sun et al. (2022)         | Fresno, CA, USA                 | <a href="https://doi.org/10.1016/j.envpol.2021.118254">https://doi.org/10.1016/j.envpol.2021.118254</a>           |
| Zheng et al. (2020)       | Beijing, China                  | <a href="https://doi.org/10.5194/amt-13-2457-2020">https://doi.org/10.5194/amt-13-2457-2020</a>                   |
| Sun et al. (2020)         | Gucheng, China                  | <a href="https://doi.org/10.1029/2019GL086288">https://doi.org/10.1029/2019GL086288</a>                           |
| Xu et al. (2021)          | Gucheng, China                  | <a href="https://doi.org/10.1039/D1EA00025J">https://doi.org/10.1039/D1EA00025J</a>                               |
| Sofowote et al. (2017)    | Toronto, Canada                 | <a href="https://doi.org/10.1016/j.atmosenv.2017.10.063">https://doi.org/10.1016/j.atmosenv.2017.10.063</a>       |
| Day et al. (2022)         | Flight, inland southeast<br>USA | <a href="https://doi.org/10.5194/amt-15-459-2022">https://doi.org/10.5194/amt-15-459-2022</a>                     |
| Lei et al. (2021)         | Beijing, China                  | <a href="https://doi.org/10.1021/acs.est.1c00479">https://doi.org/10.1021/acs.est.1c00479</a>                     |
| Li et al. (2022)          | Nanjing, China                  | <a href="https://doi.org/10.1016/j.envres.2022.113557">https://doi.org/10.1016/j.envres.2022.113557</a>           |
| Lalchandani et al. (2021) | Delhi, India                    | <a href="https://doi.org/10.1029/2021JD035232">https://doi.org/10.1029/2021JD035232</a>                           |
| Zheng et al. (2021)       | Beijing, China                  | <a href="https://doi.org/10.1021/acs.est.1c04255">https://doi.org/10.1021/acs.est.1c04255</a>                     |
| Shukla et al. (2021)      | Delhi, India                    | <a href="https://doi.org/10.1016/j.atmosenv.2021.118598">https://doi.org/10.1016/j.atmosenv.2021.118598</a>       |
| Tobler (2020)             | Delhi, India; Krakow,<br>Poland | <a href="https://doi.org/10.3929/ethz-b-000477359">https://doi.org/10.3929/ethz-b-000477359</a>                   |
| Kuang et al. (2020)       | Gucheng, China                  | <a href="https://doi.org/10.1021/acs.est.9b06836">https://doi.org/10.1021/acs.est.9b06836</a>                     |
| Sun et al. (2018)         | Beijing, China                  | <a href="https://doi.org/10.5194/acp-18-8469-2018">https://doi.org/10.5194/acp-18-8469-2018</a>                   |
| Nursanto et al. (2023)    | Cabauw, Netherlands             | <a href="https://doi.org/10.5194/egusphere-2023-554">https://doi.org/10.5194/egusphere-2023-554</a>               |
| Katz et al. (2021)        | Beijing, China                  | <a href="https://doi.org/10.1080/02786826.2021.1931013">https://doi.org/10.1080/02786826.2021.1931013</a>         |
| Sofowote et al. (2020)    | Toronto, Canada                 | <a href="https://doi.org/10.1016/j.scitotenv.2020.143225">https://doi.org/10.1016/j.scitotenv.2020.143225</a>     |
| Li et al. (2022)          | Yuncheng, China                 | <a href="https://doi.org/10.1016/j.atmosres.2022.106018">https://doi.org/10.1016/j.atmosres.2022.106018</a>       |

## S2. Sampling periods of filter levoglucosan samples

Table S2. Sampling periods of PM<sub>0.95</sub> filter levoglucosan samples collected in the COALA-2020 campaign.

| Sample ID   | Start time (UTC)    | Stop time (UTC)     |
|-------------|---------------------|---------------------|
| AUS20QFF010 | 2020-01-23 23:00:00 | 2020-01-24 22:33:00 |
| AUS20QFF011 | 2020-01-24 22:46:00 | 2020-01-25 23:36:00 |
| AUS20QFF012 | 2020-01-25 23:52:00 | 2020-01-26 22:29:00 |
| AUS20QFF013 | 2020-01-26 22:45:00 | 2020-01-27 22:38:00 |
| AUS20QFF015 | 2020-01-27 23:08:00 | 2020-01-28 22:35:00 |
| AUS20QFF017 | 2020-01-29 00:40:00 | 2020-01-29 22:26:00 |
| AUS20QFF018 | 2020-01-29 22:42:00 | 2020-01-30 22:22:00 |
| AUS20QFF050 | 2020-01-30 22:43:00 | 2020-01-31 22:29:00 |
| AUS20QFF020 | 2020-01-31 22:44:00 | 2020-02-01 22:19:00 |
| AUS20QFF021 | 2020-02-01 22:38:00 | 2020-02-02 22:21:00 |
| AUS20QFF023 | 2020-02-02 22:53:00 | 2020-02-03 22:17:00 |
| AUS20QFF025 | 2020-02-03 23:44:00 | 2020-02-05 22:42:00 |
| AUS20QFF026 | 2020-02-05 23:07:00 | 2020-02-08 01:29:00 |
| AUS20QFF027 | 2020-02-08 01:50:00 | 2020-02-09 22:49:00 |
| AUS20QFF028 | 2020-02-09 23:15:00 | 2020-02-12 01:03:00 |
| AUS20QFF051 | 2020-02-12 01:56:00 | 2020-02-14 01:00:00 |
| AUS20QFF030 | 2020-02-14 01:41:00 | 2020-02-16 01:29:00 |
| AUS20QFF032 | 2020-02-16 02:44:00 | 2020-02-17 22:26:00 |
| AUS20QFF034 | 2020-02-18 01:22:00 | 2020-02-20 01:50:00 |
| AUS20QFF035 | 2020-02-20 02:36:00 | 2020-02-22 00:22:00 |
| AUS20QFF036 | 2020-02-22 01:05:00 | 2020-02-24 00:18:00 |
| AUS20QFF037 | 2020-02-24 00:55:00 | 2020-02-25 22:29:00 |
| AUS20QFF038 | 2020-02-25 23:04:00 | 2020-02-27 22:44:00 |
| AUS20QFF040 | 2020-02-28 00:24:00 | 2020-02-29 23:28:00 |
| AUS20QFF042 | 2020-03-01 01:42:00 | 2020-03-03 00:45:00 |
| AUS20QFF043 | 2020-03-03 01:21:00 | 2020-03-04 23:48:00 |
| AUS20QFF044 | 2020-03-05 00:58:00 | 2020-03-07 00:55:00 |
| AUS20QFF045 | 2020-03-07 01:37:00 | 2020-03-08 23:14:00 |
| AUS20QFF046 | 2020-03-08 23:40:00 | 2020-03-10 22:26:00 |

### S3. Mass spectra of levoglucosan standard

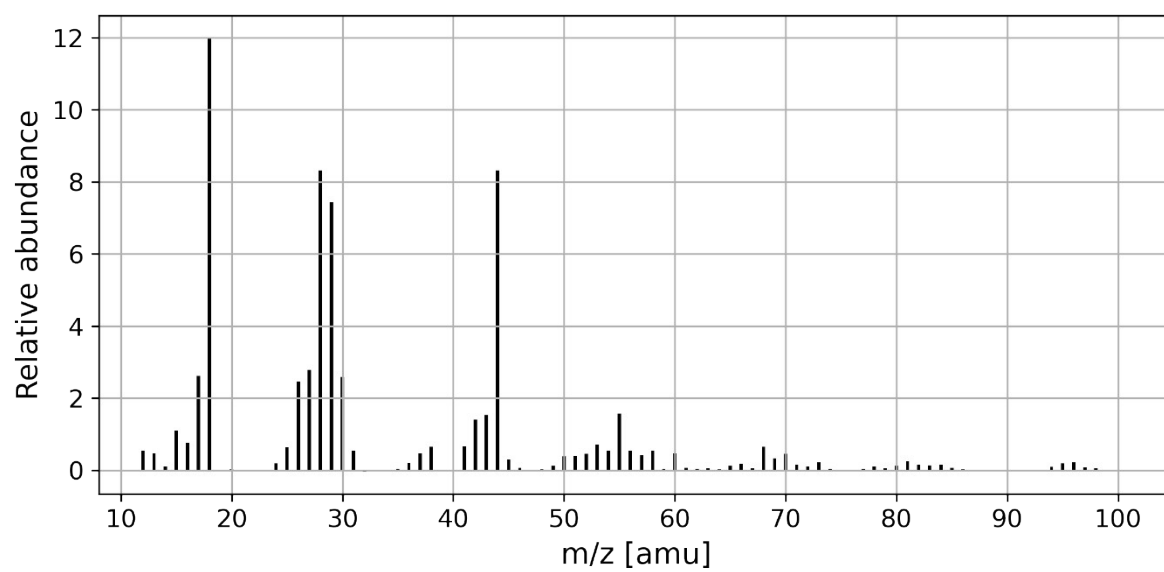

Figure S1. Mass spectra of a levoglucosan standard run through a capture vaporizer-ToF-ACSM.

#### S4. Comparison of earlier (smoky) and later (clear) periods of the COALA-2020 campaign

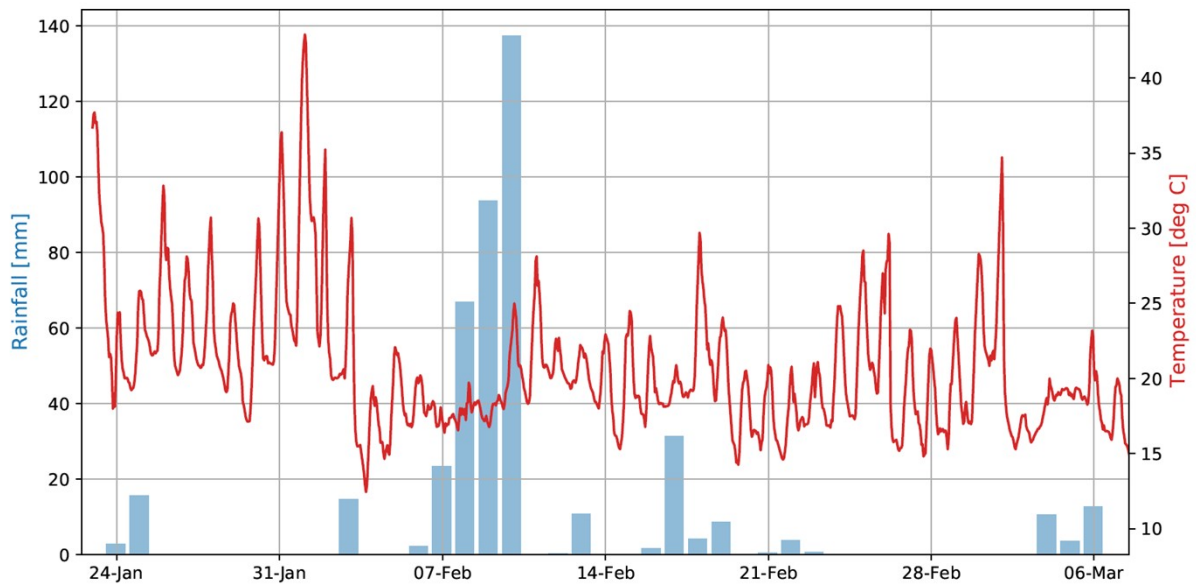

Figure S2. Temperature and rainfall observed at the observation site of the COALA-2020 campaign.

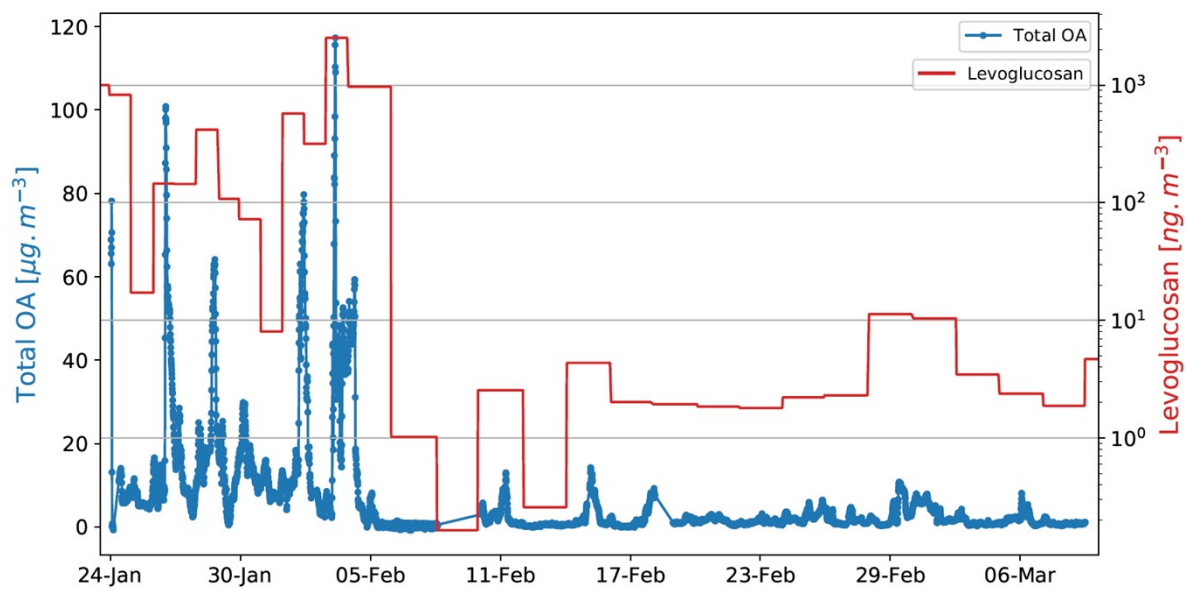

Figure S3. Concentrations of total OA and levoglucosan measured during the COALA-2020 campaign.

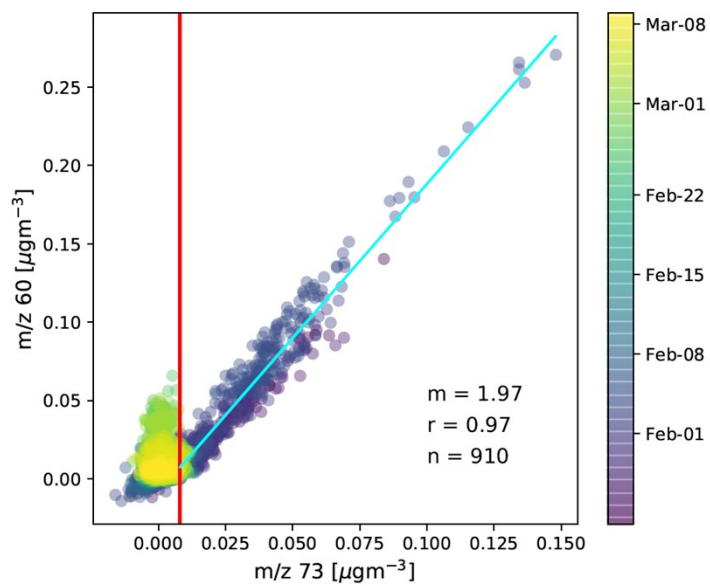

Figure S4. Correlation plot of m/z 60 and m/z 73 concentrations at the COALA-2020 campaign, showing the threshold m/z 73 concentration and parameters of their correlation. Points are shaded by date.

### S5. Mass spectra of PMF factors from COALA and KCG (May 2021)

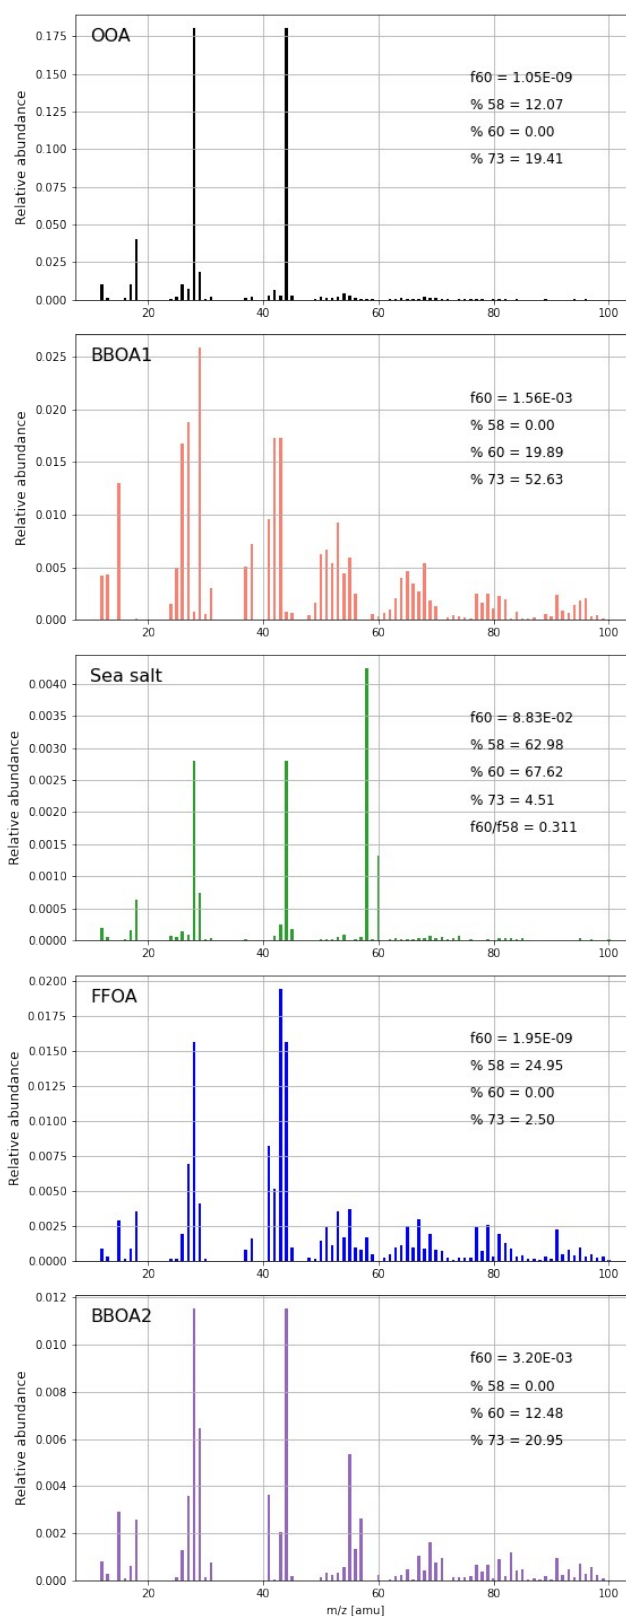

Figure S5. Mass spectra of the 5-factor PMF solution from the COALA campaign. The particle sources from top to bottom are Oxygenated OA, Biomass Burning OA 1, Sea Salt aerosols, likely Fossil Fuels

OA, and Biomass Burning OA 2. The percentage of  $m/z$  58,  $m/z$  60, and  $m/z$  73 in each factor are also listed for each factor.

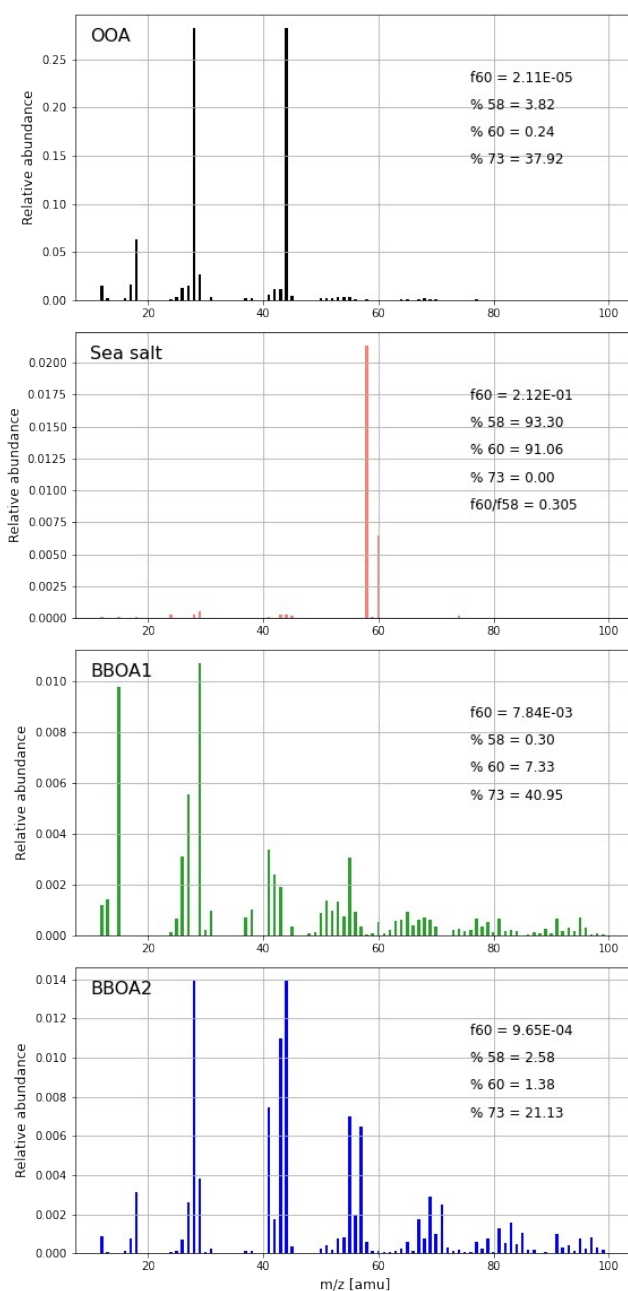

Figure S6. Mass spectra of the 5-factor PMF solution from measurements at KCG in May 2021. The particle sources from top to bottom are Oxygenated OA, Sea Salt aerosols, Biomass Burning OA 1, and Biomass Burning OA 2. The percentage of  $m/z$  58,  $m/z$  60, and  $m/z$  73 in each factor are also listed for each factor.
